# Supplementary material
Source: Springer Nature journal article supplement (https://www.springermedizin.de/resource/supplementary/12876_2011_793_MOESM1_ESM.pdf/9437760)
Supplement: MOESM1 [file 9437760]

Apparently healthy subjects screened by liver ultrasound in 2003-2005 (n=4463)

Excluded (n=1874)

Positive serology hepatitis B (n=166), hepatitis C (n=13)

Alcohol intake > 20g/day (n=531)

Prior fatty liver detected by ultrasound (n=1242)

No evidence of fatty liver (n=2589)

Diagnosis incident fatty liver at follow up in 2008-2009 (n=430)
